# Supplementary material for: Microglial SMAD4 regulated by microRNA-146a promotes migration of microglia which support tumor progression in a glioma environment
Source: PubMed Central journal article supplement (PMC5982777; doi:10.18632/oncotarget.25116), 2018-05-18
Supplement: oncotarget-09-24950-s001.pdf [file oncotarget-09-24950-s001.pdf]

## Microglial SMAD4 regulated by microRNA-146a promotes migration of microglia which support tumor progression in a glioma environment

### SUPPLEMENTARY MATERIALS

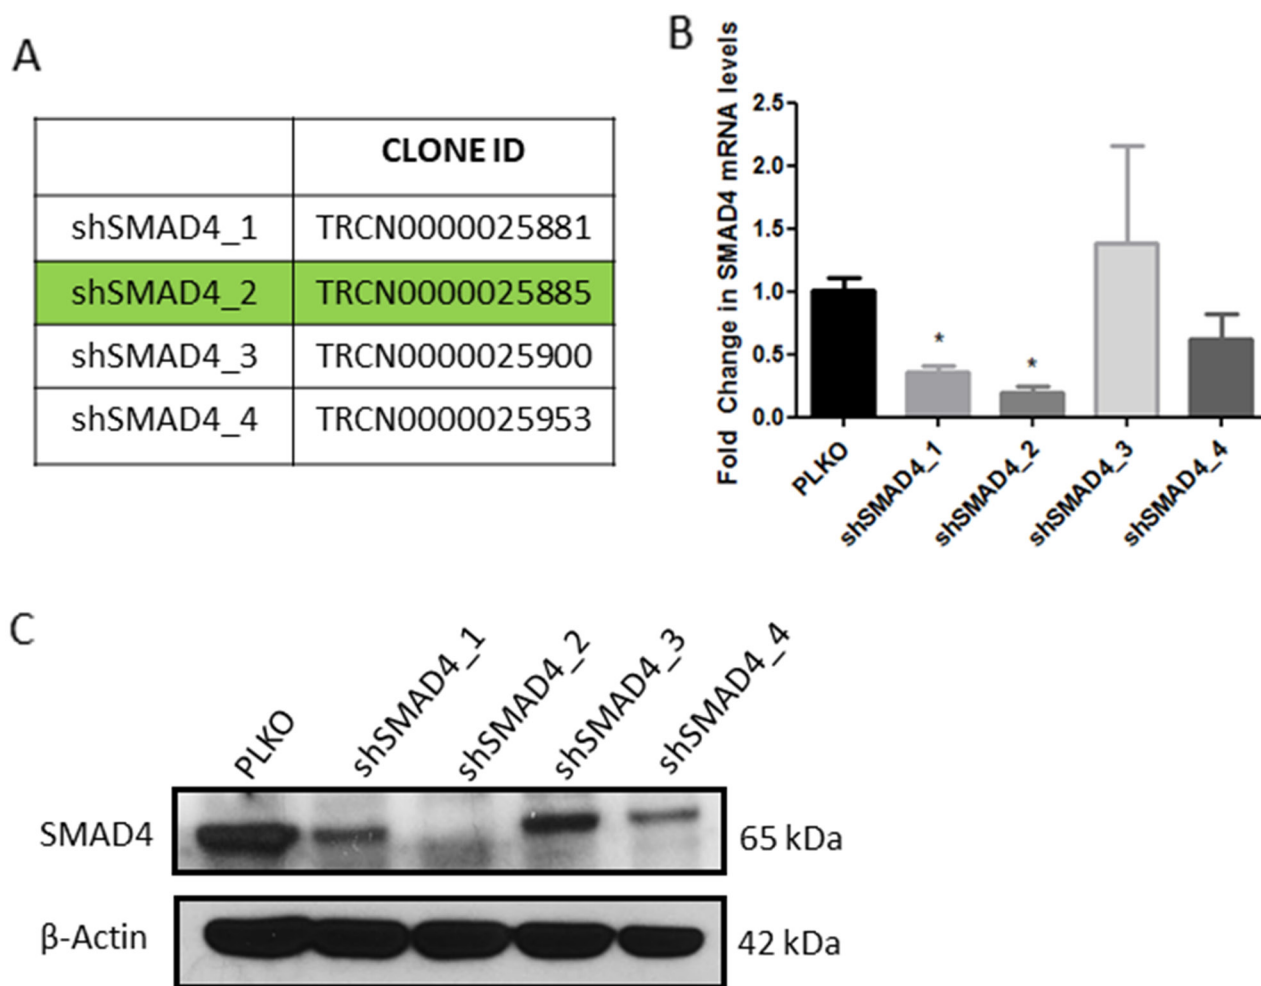

**Supplementary Figure 1:** Table shows the shRNA clones that were used for stable knockdown of SMAD4 in microglia (A). Quantitative RT-PCR and Western Blot analysis depicts the expression of SMAD4 after transduction of 4 clones of shSMAD4 in microglia (B, C).
